# Supplementary material
Source: PubMed Central journal article supplement (PMC3944329)
Supplement: mt2013190x1.pdf [file mt2013190x1.pdf]

## SUPPLEMENTARY MATERIAL

**Figure S1. GDNs are resistant to gastric and intestinal enzymatic digestion.** GDNs were incubated first in pepsin solution at 37°C for 30 min, then with pancreatin and bile extract solution for another 30 min. The change of particle size **(a)** and surface charge **(b)** were measured using a Zetasizer (n=5).

**Figure S2. The oral administration of GDNs does not induce systemic toxicity and change intestinal morphology.** Mice were gavaged with PBS or GDNs for 7 days. The serum levels of **(a)** IFN- $\gamma$ , **(b)** Alanine aminotransferase (ALT) and **(c)** Aspartate aminotransferase (AST) were measured after the last gavage (n=6). **(d)** Hematoxylin and eosin or Alcian blue and nuclear fast red stained slides of jejunum and colon were examined for morphology (n=6).

**Figure S3. Oral administration of GDNs does not alter the intestinal microenvironment during steady-state.** Mice were gavaged with GDNs for 7 days, **(a)** the 16S rDNA gene copies of different types of bacteria were quantified by real-time PCR from stool pellets, **(b)** the frequency of  $\gamma\delta$  T cells in both intraepithelial lymphocytes (IEL) and lamina propria lymphocytes (LPL) of small intestine, **(c)** the percentage of CD11b<sup>+</sup>Ly6C<sup>+</sup> monocytes, **(d)** CD11b<sup>+</sup>Ly6G<sup>+</sup> neutrophils, and **(e)** Foxp3<sup>+</sup> regulatory T cells in both small intestine (SI) and large intestine (LI) and **(f)** the frequency of TNF- $\alpha$  secreting T cells in MLN were analyzed by FACS (n=10).

**Figure S4. Cytotoxicity effect of GDNs on RAW264.7 mouse macrophages after 24 h incubation.** RAW264.7 cells were incubated with indicated concentrations of GDNs for 24 h and

then stained with Annexin-V/PI to detect the mode of cell death. Annexin V<sup>+</sup> alone indicates early apoptosis and PI<sup>+</sup> alone represents necrosis. Cells at final stage of apoptosis take up both stains. Represent result of five independent experiments.

**Figure S5. PGE<sub>2</sub> production in colonic mucosa during both steady-state (a) and on day 7 of DSS induced colitis (b).** Data shows mean ± SEM (n=6).

**Figure S6. Tissue biodistribution of orally administrated GDNs.** Mice fasted overnight were fed with DiR-labeled GDNs 2 h or 4 h before organs harvested. The biodistribution of DiR-labeled GDNs was imaged with Kodak Image Station 4000MM Pro system. The images are representative of five independent experiments.

**Figure S7. Intestinal macrophages are the major targets of orally administrated GDNs.** Mice fasted overnight were fed with PKH26-labeled GDNs 2 h and 4 h before harvesting the intestine. Intestinal epithelial cells were isolated and stained for EpCAM (a). Lamina propria myeloid-derived cells were gated on CD11b and then further analyzed on F4/80 (b) or CD11c (c) (n=5).

**Figure S8. The uptake of liposome in small and large intestines.** Mice fasted overnight were orally administered two times commercially available liposome labeled with an equivalent amount of PKH26. Sections of jejunum, ileum and colon were stained with F4/80 (green) to identify macrophages and nuclei were labeled with DAPI. (n=6). Original magnification was 40×

(left panels) with enlargement of the indicated area shown in the right panels. Dotted line indicates basement membrane.

**Figure S9. In vitro release curve of free MTX and GMTX in PBS at 37°C.** Data shows mean  $\pm$  SEM (n=5).

**Video S1. The internalization of GDNs by intestinal macrophages.** 3D reconstruction of Z-series confocal images of the jejunum section revealed the internalization of PKH-26 (red) labeled GDNs by F4/80<sup>+</sup> (green) macrophages (n=6).

**Table S1. Composition of phosphocholine (PC) and phosphoethanolamine (PE) found in GDN**

| Formula    | Name     | Percentage |
|------------|----------|------------|
| <b>PC</b>  |          |            |
| C40H80O8PN | PC(32:0) | 1.53       |
| C42H76O8PN | PC(34:4) | 0.86       |
| C42H78O8PN | PC(34:3) | 10.67      |
| C42H80O8PN | PC(34:2) | 28.63      |
| C42H82O8PN | PC(34:1) | 13.88      |
| C44H76O8PN | PC(36:6) | 0.48       |
| C44H78O8PN | PC(36:5) | 4.07       |
| C44H80O8PN | PC(36:4) | 11.34      |
| C44H82O8PN | PC(36:3) | 18.36      |
| C44H84O8PN | PC(36:2) | 8.49       |
| C44H86O8PN | PC(36:1) | 0.72       |
| C46H80O8PN | PC(38:6) | 0.05       |
| C46H82O8PN | PC(38:5) | 0.02       |
| C46H84O8PN | PC(38:4) | 0.07       |
| C46H86O8PN | PC(38:3) | 0.32       |
| C46H88O8PN | PC(38:2) | 0.33       |
| C48H86O8PN | PC(40:5) | 0.00       |

|            |          |       |
|------------|----------|-------|
| C48H88O8PN | PC(40:4) | 0.01  |
| C48H90O8PN | PC(40:3) | 0.08  |
| C48H92O8PN | PC(40:2) | 0.09  |
| <b>PE</b>  |          |       |
| C37H68O8PN | PE(32:3) | 0.02  |
| C37H70O8PN | PE(32:2) | 0.39  |
| C37H72O8PN | PE(32:1) | 2.28  |
| C37H74O8PN | PE(32:0) | 0.17  |
| C39H70O8PN | PE(34:4) | 0.37  |
| C39H72O8PN | PE(34:3) | 7.78  |
| C39H74O8PN | PE(34:2) | 37.01 |
| C39H76O8PN | PE(34:1) | 7.62  |
| C41H70O8PN | PE(36:6) | 0.30  |
| C41H72O8PN | PE(36:5) | 3.04  |
| C41H74O8PN | PE(36:4) | 14.98 |
| C41H76O8PN | PE(36:3) | 18.10 |
| C41H78O8PN | PE(36:2) | 5.12  |
| C41H80O8PN | PE(36:1) | 0.34  |
| C43H74O8PN | PE(38:6) | 0.04  |
| C43H76O8PN | PE(38:5) | 0.00  |
| C43H78O8PN | PE(38:4) | 0.12  |
| C43H80O8PN | PE(38:3) | 0.37  |
| C45H84O8PN | PE(40:3) | 0.29  |
| C45H86O8PN | PE(40:2) | 0.51  |
| C47H86O8PN | PE(42:4) | 0.01  |
| C47H88O8PN | PE(42:3) | 0.14  |
| C47H90O8PN | PE(42:2) | 1.01  |

**Table S2. Identities of proteins found in GDNs**

| <b>Protein name</b>             | <b>Accession number</b> | <b>Molecular weight</b> |
|---------------------------------|-------------------------|-------------------------|
| (E)-beta-farnesene synthase     | G8Z362 (+1)             | 64 kDa                  |
| (E)-beta-ocimene synthase       | Q5CD81                  | 71 kDa                  |
| 1,2 rhamnosyltransferase        | D0UZK1 (+2)             | 51 kDa                  |
| 1,6-rhamnosyltransferase        | A7ISD3                  | 53 kDa                  |
| 280 kDa protein                 | Q80H98                  | 280 kDa                 |
| 286 kDa polyprotein             | Q15GA4 (+2)             | 286 kDa                 |
| 2-phospho-D-glycerate hydrolase | D7NHW9                  | 48 kDa                  |

|                                                      |             |         |
|------------------------------------------------------|-------------|---------|
| 349 kDa polyprotein                                  | D0EAL9      | 348 kDa |
| 349-kDa polyprotein                                  | Q9DTG5      | 349 kDa |
| Acidic cellulase                                     | O22297      | 55 kDa  |
| Acidic class I chitinase                             | Q8H986      | 34 kDa  |
| Aconitate hydratase 1                                | D3GQL0      | 98 kDa  |
| Actin                                                | K7N8A0      | 42 kDa  |
| Alcohol acyl transferase                             | A8W8Y0      | 51 kDa  |
| Allene oxide synthase                                | Q84V85      | 59 kDa  |
| Aminopeptidase                                       | F8WL79      | 102 kDa |
| Apocytochrome f                                      | Q09MG5      | 35 kDa  |
| Ascorbate peroxidase                                 | J7EIR8      | 28 kDa  |
| Ascorbate peroxidase                                 | B9VRH6      | 28 kDa  |
| Auxin-response factor                                | G9I820      | 94 kDa  |
| Beta-amylase                                         | J7ICW8      | 65 kDa  |
| Beta-galactosidase                                   | Q8L5Q9      | 82 kDa  |
| Beta-pinene synthase                                 | A7BG60      | 69 kDa  |
| Beta-tubulin                                         | C0KLD1      | 50 kDa  |
| Capsid protein                                       | Q91QZ1      | 41 kDa  |
| Capsid protein                                       | Q3SAK9      | 31 kDa  |
| Cation chloride cotransporter                        | D2U833      | 108 kDa |
| Chalcone synthase                                    | C3VPJ0 (+3) | 43 kDa  |
| Chloride channel protein                             | D5LM39      | 86 kDa  |
| Cinnamate 4-hydroxylase CYP73                        | Q9M4U0      | 61 kDa  |
| Citrin                                               | Q39627      | 55 kDa  |
| Coat protein                                         | G2XKD3      | 25 kDa  |
| Coat protein                                         | Q3L2I6      | 25 kDa  |
| CRT/DRE binding factor                               | D5FV16      | 24 kDa  |
| CTV.2                                                | Q8H6S5      | 124 kDa |
| CTV.20                                               | Q8H6Q8      | 364 kDa |
| CTV.22                                               | Q8H6Q7      | 155 kDa |
| Cytochrome P450                                      | Q1I1D7      | 54 kDa  |
| Dehydrin                                             | Q7Y045      | 27 kDa  |
| DNA excision repair protein                          | F8WLD2      | 74 kDa  |
| DNA-directed RNA polymerase subunit beta"            | Q09MI8      | 159 kDa |
| Ethylene response 1                                  | D2WKC9      | 83 kDa  |
| Ethylene response sensor 1                           | D2WKD2      | 71 kDa  |
| Ethylene-insensitive 3-like 1 protein                | D7PVG7      | 70 kDa  |
| Eukaryotic translation initiation factor 3 subunit E | G3CHK8      | 52 kDa  |
| Fatty acid hydroperoxide lyase                       | A9NJG4 (+3) | 56 kDa  |
| F-box family protein                                 | B8Y9B5      | 53 kDa  |
| Fe(III)-chelate reductase                            | Q000W4      | 80 kDa  |
| Fructokinase                                         | Q6Q3H4      | 38 kDa  |
| Gag-pol polyprotein                                  | F8WL95      | 177 kDa |

|                                                         |             |         |
|---------------------------------------------------------|-------------|---------|
| Gamma-terpinene synthase, chloroplastic                 | Q8L5K4      | 70 kDa  |
| Glucose-1-phosphate adenylyltransferase                 | Q9SP43      | 57 kDa  |
| Glutathione S-transferase                               | Q3HM93      | 24 kDa  |
| GRAS family transcription factor                        | D0VEW6      | 57 kDa  |
| Heat shock protein                                      | F8WL87      | 34 kDa  |
| Hsp90                                                   | H9NHK0      | 80 kDa  |
| Jp18                                                    | Q8H6R4      | 23 kDa  |
| Leucine-rich repeat family protein                      | G3CHK6      | 51 kDa  |
| Limonoid UDP-glucosyltransferase                        | B2YGX9 (+1) | 57 kDa  |
| MADS-box protein                                        | Q05KK0      | 30 kDa  |
| Mechanosensitive ion channel domain-containing protein  | F8WLB4      | 79 kDa  |
| Monoterpene synthase                                    | Q5CD82      | 70 kDa  |
| MYB transcription factor                                | F8WLC4      | 23 kDa  |
| NAC domain protein                                      | A5YWA9      | 35 kDa  |
| NAD(P)H-quinone oxidoreductase subunit 5, chloroplastic | Q09MC9      | 84 kDa  |
| NBS-LRR type disease resistance protein                 | Q8H6R9      | 102 kDa |
| NBS-LRR type disease resistance protein                 | Q8H6S0      | 101 kDa |
| NBS-LRR type disease resistance protein                 | Q8H6R6      | 101 kDa |
| p1a                                                     | J9WR93      | 348 kDa |
| P23                                                     | Q1X8V8      | 24 kDa  |
| P23                                                     | E7DSS0 (+4) | 24 kDa  |
| p27                                                     | G0Z9I6      | 27 kDa  |
| p33                                                     | I3XHN0      | 34 kDa  |
| p33 protein                                             | B8YDL3      | 34 kDa  |
| p33 protein                                             | B9VB22      | 34 kDa  |
| P346                                                    | P87587      | 347 kDa |
| p349 protein                                            | B9VB56      | 349 kDa |
| p349 protein                                            | I3RWW7      | 347 kDa |
| p349 protein                                            | B9VB20      | 348 kDa |
| p349 protein                                            | Q9WID7      | 347 kDa |
| P353                                                    | Q2XP16      | 353 kDa |
| Pectinesterase 1                                        | O04886 (+1) | 64 kDa  |
| Peptidyl-prolyl cis-trans isomerase                     | F8WL74      | 58 kDa  |
| Peroxidase                                              | Q0ZA67      | 37 kDa  |
| Phosphoenolpyruvate carboxylase                         | F1CT41      | 100 kDa |
| Phytoene synthase                                       | B1PBV7 (+2) | 50 kDa  |
| Plastid-lipid-associated protein, chloroplastic         | Q9ZWQ8      | 35 kDa  |
| Pol polyprotein                                         | Q94FM1      | 33 kDa  |
| Pol polyprotein                                         | Q94FM0      | 80 kDa  |
| Poly C-binding protein                                  | G9I825      | 62 kDa  |
| Polygalacturonase inhibitor                             | O64460 (+7) | 36 kDa  |
| Polyprotein                                             | I3XHM8      | 349 kDa |
| Polyprotein                                             | C0STR9      | 175 kDa |

|                                                            |             |         |
|------------------------------------------------------------|-------------|---------|
| Polyprotein                                                | H6U1F0      | 148 kDa |
| Polyprotein                                                | B8QHP8      | 242 kDa |
| Polyprotein                                                | I3V6C0      | 241 kDa |
| Polyprotein                                                | C0STS0      | 175 kDa |
| Polyprotein                                                | K0FGH5      | 241 kDa |
| Polyprotein                                                | Q3HWZ1      | 241 kDa |
| PPR containing protein                                     | F8WLA5      | 64 kDa  |
| Probable phospholipid hydroperoxide glutathione peroxidase | Q06652 (+1) | 19 kDa  |
| Profilin                                                   | P84177      | 14 kDa  |
| Protein ycf2                                               | Q09MB4      | 268 kDa |
| PSI reaction center subunit II                             | A8C183      | 23 kDa  |
| Putative 2b protein                                        | A5JVP6      | 22 kDa  |
| Putative eukaryotic translation initiation factor 1        | D0EFM2      | 32 kDa  |
| Putative gag-pol polyprotein                               | Q18L98      | 152 kDa |
| Putative movement protein                                  | B5AMI9      | 40 kDa  |
| Putative multiple stress-responsive zinc-finger protein    | A1ECK5      | 18 kDa  |
| Putative replicase polyprotein                             | B5AMJ0      | 227 kDa |
| Putative RNA-dependent RNA polymerase                      | I7CYN5      | 186 kDa |
| Putative terpene synthase                                  | Q8RVR2      | 64 kDa  |
| Putative uncharacterized protein                           | B5TE89      | 169 kDa |
| Putative uncharacterized protein                           | Q8JVF3      | 54 kDa  |
| Putative uncharacterized protein ORF43                     | F8WLB0      | 52 kDa  |
| Putative viral replicase                                   | A5JVP4      | 121 kDa |
| Replicase                                                  | M1JAW3      | 285 kDa |
| Replicase polyprotein                                      | H6VXK8      | 230 kDa |
| Replicase protein 1a                                       | J9UF50 (+1) | 118 kDa |
| Replicase protein 2a                                       | J9RV45      | 95 kDa  |
| Replicase-associated polyprotein                           | Q5EGG5      | 240 kDa |
| RNA recognition motif protein 1                            | G9I823      | 86 kDa  |
| RNA-dependent RNA polymerase                               | J7EPC0      | 187 kDa |
| RNA-directed RNA polymerase L                              | Q6DN67      | 280 kDa |
| SEPALLATA1 homolog                                         | A9CQM4      | 28 kDa  |
| Sucrose synthase                                           | Q9SLS2      | 92 kDa  |
| Sucrose synthase                                           | Q9SLV8 (+1) | 93 kDa  |
| Temperature-induced lipocalin                              | Q38JC1      | 22 kDa  |
| Tetratricopeptide domain-containing thioredoxin            | D0ELH6      | 37 kDa  |
| Thaumatococcus-like protein                                | D2KU75      | 27 kDa  |
| Translation elongation factor                              | C3VIC2      | 48 kDa  |
| Ubiquitin/ribosomal fusion protein                         | D5LY07      | 18 kDa  |
| UDP-glucosyltransferase family 1 protein                   | C6KI43      | 56 kDa  |
| Vacuolar citrate/H <sup>+</sup> symporter                  | A0FKR1      | 57 kDa  |
| Vacuolar invertase                                         | Q944C8      | 65 kDa  |

|                                |        |        |
|--------------------------------|--------|--------|
| V-type proton ATPase subunit E | Q9MB46 | 26 kDa |
| WD-40 repeat family protein    | F8WL82 | 58 kDa |

---

**Table S3. Primer sets used in PCR analysis**

| <b>Gene</b>    | <b>Forward Primer</b> | <b>Reverse Primer</b> |
|----------------|-----------------------|-----------------------|
| IL-1 $\beta$   | GTTCCCATTAGACAACCTGC  | GATTCTTTCCTTTGAGGC    |
| IL-6           | GATACCACTCCCAACAGACC  | GCAATGGCAATTCTGATTGT  |
| TNF- $\alpha$  | TCTATGGCCCAGACCCTCAC  | GACGGCAGAGAGGAGGTTGA  |
| IFN- $\gamma$  | ACTGGCAAAAGGATGGTGAC  | TGAGCTCATTGAATGCTTGG  |
| Cox-2          | TGAGTACCGCAAACGCTTCT  | CTCCCCAAAGATAGCATCTGG |
| GPDH           | AGGTCATCCCAGAGCTGAACG | ACCCTGTTGCTGTAGCCGTAT |
| $\beta$ -actin | CTGTCCCTGTATGCCTCTG   | ATGTCACGCACGATTTCC    |

---

**SUPPLEMENTARY DATA**



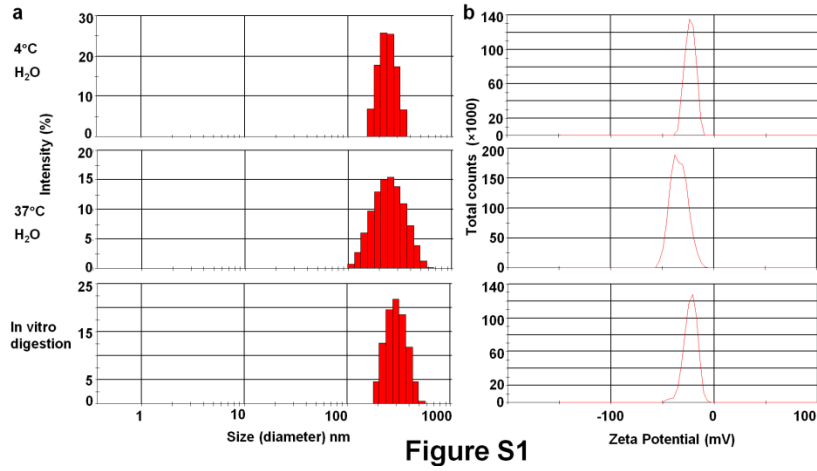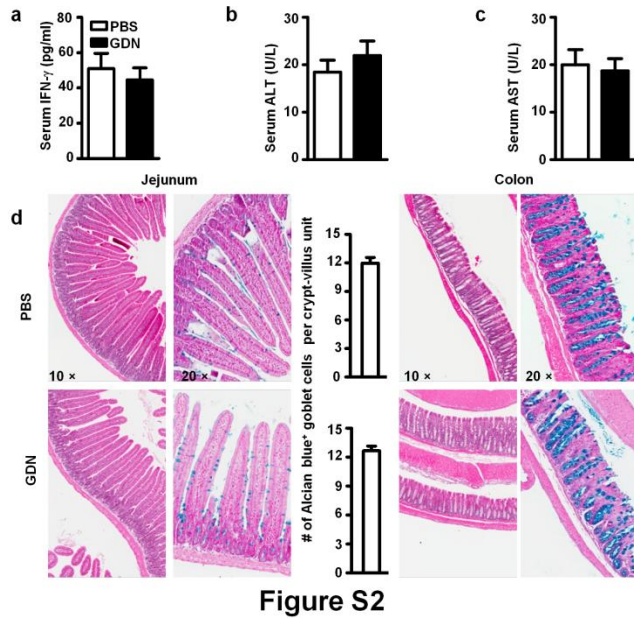

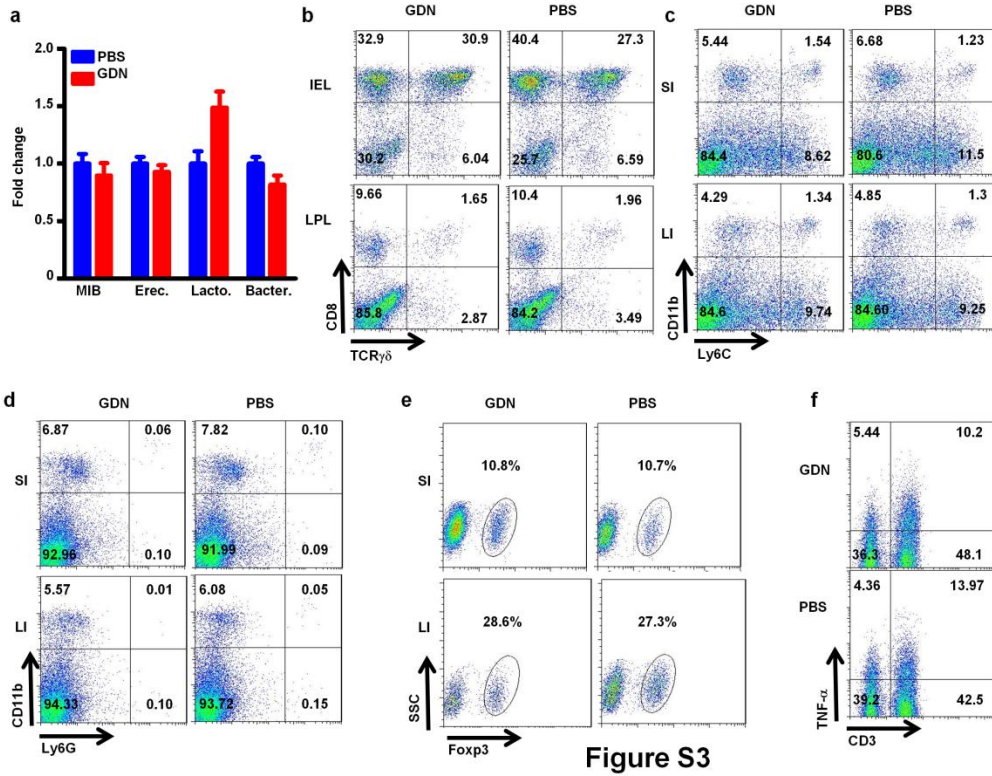

Figure S3

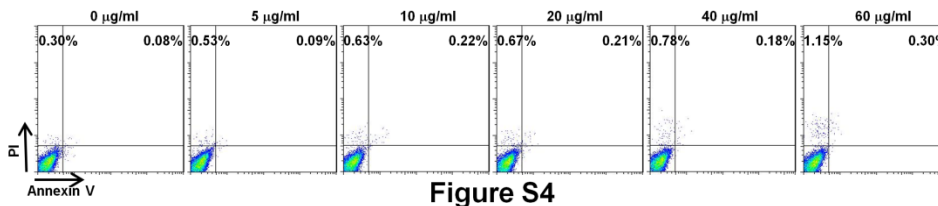

Figure S4

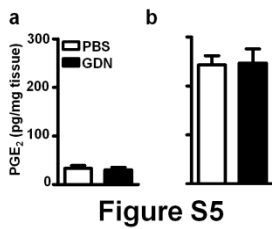

Figure S5

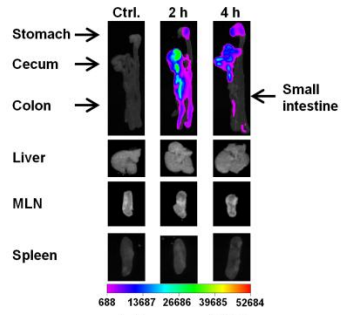

**Figure S6**

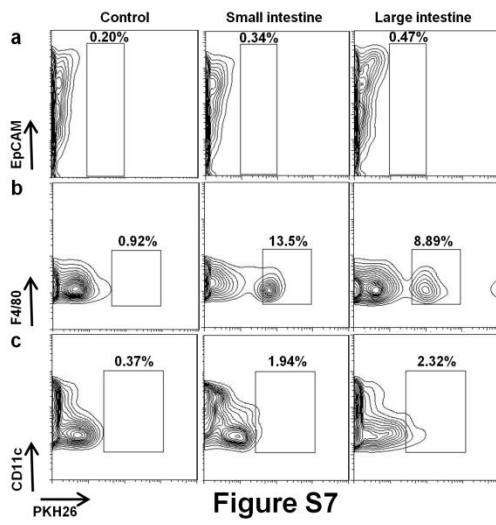

**Figure S7**

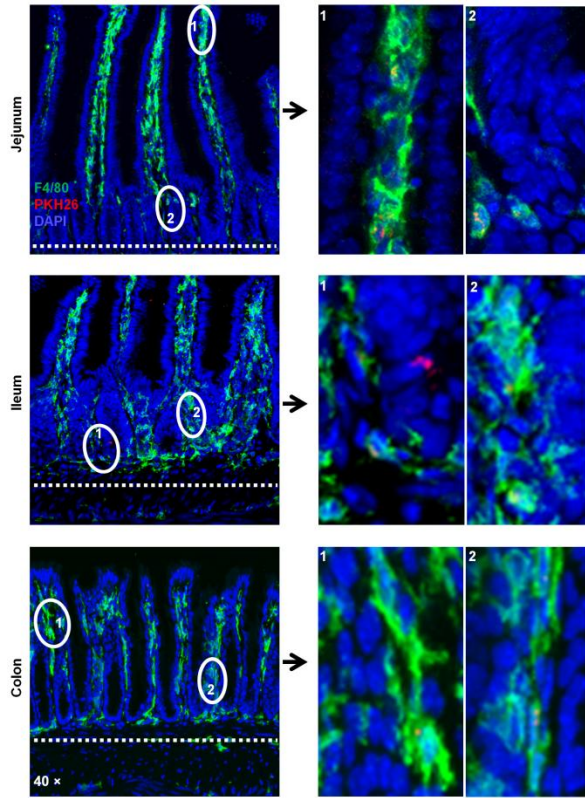

Figure S8

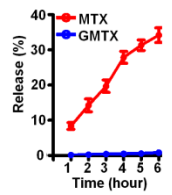

Figure S9
